# Supplementary material
Source: MDPI journal article supplement (https://www.mdpi.com/2077-0472/11/9/903)
Supplement: s1 [file s1]

**Table S2.** Soil organic carbon (bulk-C) and total nitrogen (bulk-N) concentrations calculated from fractions soil organic C and total N concentrations and C and N recovery depending on treatments.

| Treatments | Bulk-C (g kg <sup>-1</sup> ) | C recovery <sup>1</sup> (%) | Bulk-N (g kg <sup>-1</sup> ) | N recovery (%)      |
|------------|------------------------------|-----------------------------|------------------------------|---------------------|
| C-control  | 12.2 <sup>a3</sup>           | 94.5 <sup>ab</sup>          | 1.18 <sup>a</sup>            | 112.5 <sup>ab</sup> |
| C-fertN1   | 13.7 <sup>ab</sup>           | 93.5 <sup>ab</sup>          | 1.28 <sup>a</sup>            | 114.6 <sup>ab</sup> |
| C-fertN2   | 13.2 <sup>ab</sup>           | 88.2 <sup>a</sup>           | 1.23 <sup>a</sup>            | 109.0 <sup>a</sup>  |
| C-fertN3   | 13.4 <sup>bc</sup>           | 96.0 <sup>b</sup>           | 1.26 <sup>a</sup>            | 122.9 <sup>bc</sup> |
| O-control  | 14.8 <sup>de</sup>           | 100.8 <sup>b</sup>          | 1.45 <sup>a</sup>            | 128.2 <sup>c</sup>  |
| O-CC       | 14.8 <sup>e</sup>            | 98.6 <sup>b</sup>           | 1.43 <sup>a</sup>            | 125.2 <sup>bc</sup> |
| O-CC-M     | 15.4 <sup>de</sup>           | 94.8 <sup>ab</sup>          | 1.47 <sup>a</sup>            | 123.2 <sup>bc</sup> |

Note. <sup>1</sup>C and N recovery indicate the bulk-C and bulk-N proportion of soil organic C and total

N
