# Supplementary material
Source: MDPI journal article supplement (https://www.mdpi.com/2077-0472/11/9/903)
Supplement: s1 [file s1]

**Table S1.** Dry matter and carbon (C) concentrations of manure used in the period 2012–2018.

[illegible]
