# Supplementary material
Source: MDPI journal article supplement (https://www.mdpi.com/2077-0472/11/9/903)
Supplement: s1 [file s1]

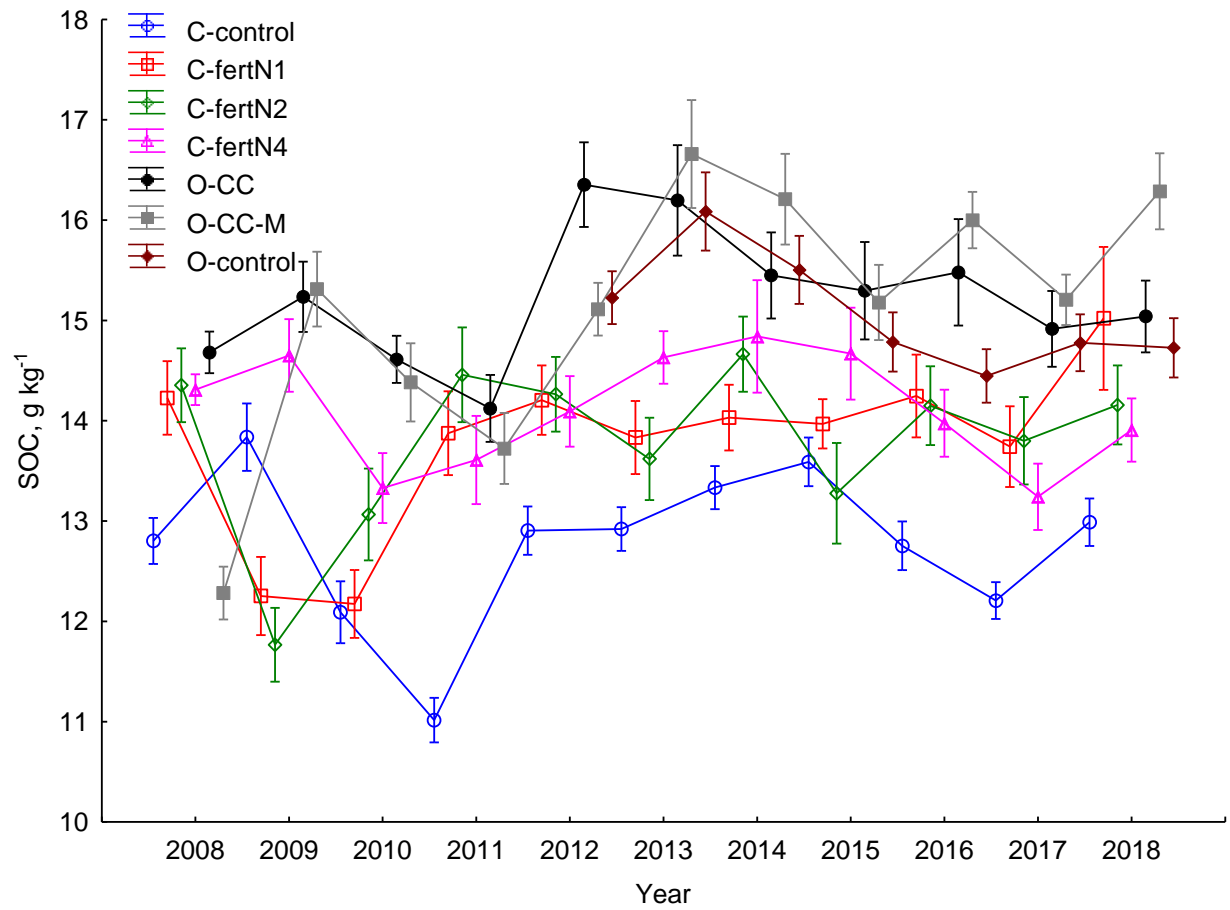

**Figure S2.** Dynamics of soil organic carbon (SOC) concentration depending on treatment during 2008–2018. Error bars denote  $\pm$  standard error.
