# Supplementary material
Source: MDPI journal article supplement (https://www.mdpi.com/2077-0472/11/9/903)
Supplement: s1 [file s1]

**Table S3.** Average weather conditions at the field site 2008–2014, compared with the long-term average (1969–2014).

| Table B5.1 Average weather conditions at the field site 2008–2017, compared with the long-term average (1964–2017). |                           |       |       |       |       |      |       |       |       |       |       |           |           |
|---------------------------------------------------------------------------------------------------------------------|---------------------------|-------|-------|-------|-------|------|-------|-------|-------|-------|-------|-----------|-----------|
| Month                                                                                                               | Mean temperature (°C)     |       |       |       |       |      |       |       |       |       |       |           |           |
|                                                                                                                     | 2008                      | 2009  | 2010  | 2011  | 2012  | 2013 | 2014  | 2015  | 2016  | 2017  | 2018  | 2008–2018 | 1964–2018 |
| January                                                                                                             | −1.3                      | −3.4  | −12.5 | −4.7  | −5.9  | −7.3 | −7.9  | −1.8  | −9.4  | −3.5  | −2.4  | −5.5      | −5.7      |
| February                                                                                                            | 0.6                       | −4.8  | −7.5  | −11.2 | −11.2 | −3.6 | −0.2  | −0.9  | 0.3   | −2.9  | −8.3  | −4.5      | −5.7      |
| March                                                                                                               | 0.4                       | −1.5  | −2.2  | −1.9  | −0.4  | −7.9 | 2.2   | 2.7   | −0.1  | 1.4   | −3.5  | −1.0      | −1.5      |
| April                                                                                                               | 7.2                       | 5.3   | 6.1   | 6.4   | 5.0   | 3.5  | 6.5   | 5.4   | 6.1   | 3.4   | 7.2   | 5.6       | 4.8       |
| May                                                                                                                 | 10.6                      | 11.4  | 12.6  | 11    | 11.8  | 14.8 | 11.9  | 10.3  | 14    | 10.3  | 15.9  | 12.2      | 11.4      |
| June                                                                                                                | 14.5                      | 13.8  | 14.6  | 17.2  | 13.6  | 18.2 | 13.4  | 14.2  | 15.9  | 14    | 15.9  | 15.0      | 15.4      |
| July                                                                                                                | 16.1                      | 16.9  | 22.2  | 19.9  | 17.9  | 17.7 | 19.3  | 15.7  | 17.8  | 15.9  | 20.7  | 18.2      | 17.4      |
| August                                                                                                              | 15.8                      | 15.4  | 18.4  | 15.8  | 15.2  | 17   | 16.8  | 17    | 16.1  | 16.8  | 18.9  | 16.7      | 16.1      |
| September                                                                                                           | 9.8                       | 12.8  | 11.1  | 12.3  | 12.2  | 10.8 | 12.1  | 12.6  | 12.3  | 12.2  | 14.3  | 12.0      | 11.1      |
| October                                                                                                             | 8.3                       | 4.1   | 4.2   | 6.8   | 5.9   | 6.6  | 5.3   | 4.6   | 4.1   | 5.4   | 7.6   | 5.7       | 5.7       |
| November                                                                                                            | 2.3                       | 2.3   | 0.3   | 2.9   | 2.6   | 3.5  | 1.4   | 3.6   | −1    | 2.4   | 2.4   | 2.1       | 0.5       |
| December                                                                                                            | −1.1                      | −5.5  | −8.2  | 1.0   | −6.8  | 1.0  | −1.5  | 2.5   | −0.4  | 0.2   | −2.7  | −2.0      | −3.1      |
| January–December                                                                                                    | 6.9                       | 5.6   | 4.9   | 6.3   | 5.0   | 6.2  | 6.6   | 7.2   | 6.3   | 6.3   | 7.2   | 6.2       | 5.5       |
|                                                                                                                     | Sum of precipitation (mm) |       |       |       |       |      |       |       |       |       |       |           |           |
| January                                                                                                             | 21.8                      | 10.2  | 3.2   | 19.0  | 30.2  | 11.4 | 25    | 29.6  | 34    | 27.4  | 20.4  | 21.1      | 28.6      |
| February                                                                                                            | 34.4                      | 7.2   | 11.8  | 9.4   | 18.6  | 14.4 | 12.4  | 8.4   | 55.8  | 22.4  | 11.7  | 18.8      | 22.6      |
| March                                                                                                               | 8.4                       | 22.4  | 30.2  | 5.8   | 39.4  | 15.6 | 9.0   | 12.0  | 23.3  | 17.0  | 12.9  | 17.8      | 22.5      |
| April                                                                                                               | 26.8                      | 14.2  | 26.4  | 11.2  | 42.0  | 16.8 | 13.4  | 69.0  | 51.6  | 51.5  | 28.1  | 31.9      | 31.2      |
| May                                                                                                                 | 27.4                      | 13.4  | 61.4  | 58.4  | 81.6  | 61.2 | 83.8  | 62.0  | 1.6   | 15.5  | 7.8   | 43.1      | 52.9      |
| June                                                                                                                | 110.6                     | 137.4 | 72.6  | 35.2  | 100.6 | 52.4 | 103.4 | 39.4  | 124.6 | 94.3  | 60.8  | 84.7      | 70.9      |
| July                                                                                                                | 53.8                      | 54.6  | 36.0  | 48.2  | 75.0  | 62.6 | 71.4  | 61.4  | 81.6  | 60.7  | 14.0  | 56.3      | 69.2      |
| August                                                                                                              | 117.8                     | 89.2  | 106.8 | 54.6  | 87.4  | 75.6 | 113.0 | 41.2  | 42.0  | 106.2 | 59.3  | 81.2      | 81.1      |
| September                                                                                                           | 45.6                      | 49.0  | 93.0  | 80.0  | 59.8  | 37.6 | 22.2  | 59.0  | 15.4  | 83.4  | 72.1  | 56.1      | 59.3      |
| October                                                                                                             | 67.6                      | 116   | 49.4  | 47.8  | 45.2  | 44.6 | 35.8  | 10.8  | 33.2  | 75.3  | 55.3  | 52.8      | 56.3      |
| November                                                                                                            | 49.4                      | 35.8  | 77.6  | 34.4  | 50.2  | 69.8 | 10.4  | 53.8  | 45.5  | 26.1  | 18.9  | 42.9      | 44.7      |
| December                                                                                                            | 23.6                      | 57.0  | 17.8  | 52.6  | 9.2   | 47.0 | 41.6  | 46.3  | 30.6  | 51.8  | 36.9  | 37.7      | 36.6      |
| January–December                                                                                                    | 587.2                     | 606.4 | 586.2 | 456.6 | 639.2 | 509  | 541.4 | 492.9 | 539.2 | 631.6 | 398.2 | 544.4     | 575.9     |
