# Supplementary material
Source: MDPI journal article supplement (https://www.mdpi.com/2077-0472/11/9/903)
Supplement: s1 [file s1]

**Table S4.** The peak intensities ( $\times 1000$ ) at selected wavelengths ( $\text{cm}^{-1}$ ) for bulk soil (bulk), particulate soil organic matter (POM) and mineral-associated organic matter (MAOM).

| Treatments | Wavelength          |                    |                     |                    |                    |
|------------|---------------------|--------------------|---------------------|--------------------|--------------------|
|            | 1004                | 1409               | 1635                | 2856+2920          | 3401               |
| Bulk       |                     |                    |                     |                    |                    |
| C-control  | 176.4 <sup>a1</sup> | 1.02 <sup>a</sup>  | 4.90 <sup>a</sup>   | 0.27 <sup>b</sup>  | 0.98 <sup>a</sup>  |
| C-fertN3   | 178.1 <sup>a</sup>  | 0.94 <sup>a</sup>  | 5.51 <sup>a</sup>   | 0.10 <sup>a</sup>  | 1.08 <sup>a</sup>  |
| O-control  | 207.4 <sup>b</sup>  | 1.30 <sup>b</sup>  | 6.47 <sup>b</sup>   | 0.05 <sup>a</sup>  | 1.48 <sup>bc</sup> |
| O-CC       | 211.4 <sup>b</sup>  | 1.32 <sup>bc</sup> | 7.00 <sup>bc</sup>  | 0.09 <sup>a</sup>  | 1.42 <sup>b</sup>  |
| O-CC-M     | 219.2 <sup>b</sup>  | 1.52 <sup>c</sup>  | 7.30 <sup>c</sup>   | 0.00 <sup>a</sup>  | 1.62 <sup>c</sup>  |
| POM        |                     |                    |                     |                    |                    |
| C-control  | 163.7 <sup>a</sup>  | 0.07 <sup>a</sup>  | 1.79 <sup>a</sup>   | 0.00 <sup>a</sup>  | 0.48 <sup>a</sup>  |
| C-fertN3   | 179.7 <sup>b</sup>  | 0.17 <sup>a</sup>  | 3.54 <sup>b</sup>   | 0.11 <sup>ab</sup> | 0.78 <sup>ab</sup> |
| O-control  | 199.0 <sup>d</sup>  | 0.65 <sup>bc</sup> | 4.87 <sup>c</sup>   | 0.14 <sup>b</sup>  | 1.26 <sup>c</sup>  |
| O-CC       | 193.6 <sup>cd</sup> | 0.71 <sup>c</sup>  | 4.39 <sup>bc</sup>  | 0.08 <sup>ab</sup> | 1.32 <sup>c</sup>  |
| O-CC-M     | 182.8 <sup>bc</sup> | 0.44 <sup>b</sup>  | 4.08 <sup>bc</sup>  | 0.12 <sup>ab</sup> | 0.91 <sup>b</sup>  |
| MAOM       |                     |                    |                     |                    |                    |
| C-control  | 337.2 <sup>ab</sup> | 1.90 <sup>a</sup>  | 13.68 <sup>ab</sup> | 0.31 <sup>a</sup>  | 4.13 <sup>b</sup>  |
| C-fertN3   | 327.2 <sup>a</sup>  | 1.91 <sup>a</sup>  | 13.67 <sup>ab</sup> | 0.40 <sup>ab</sup> | 3.91 <sup>b</sup>  |
| O-control  | 345.4 <sup>b</sup>  | 1.86 <sup>a</sup>  | 14.10 <sup>b</sup>  | 0.29 <sup>a</sup>  | 3.86 <sup>ab</sup> |
| O-CC       | 335.8 <sup>ab</sup> | 2.05 <sup>ab</sup> | 13.61 <sup>ab</sup> | 0.75 <sup>c</sup>  | 3.51 <sup>a</sup>  |
| O-CC-M     | 332.9 <sup>ab</sup> | 2.30 <sup>b</sup>  | 13.02 <sup>a</sup>  | 0.65 <sup>bc</sup> | 3.84 <sup>ab</sup> |

Note. <sup>1</sup>different lowercase letters in the columns indicate statistically significant ( $P < 0.05$ ) farming systems difference.
