# Supplementary material
Source: MDPI journal article supplement (https://www.mdpi.com/2077-0472/11/9/903)
Supplement: s1 [file s1]

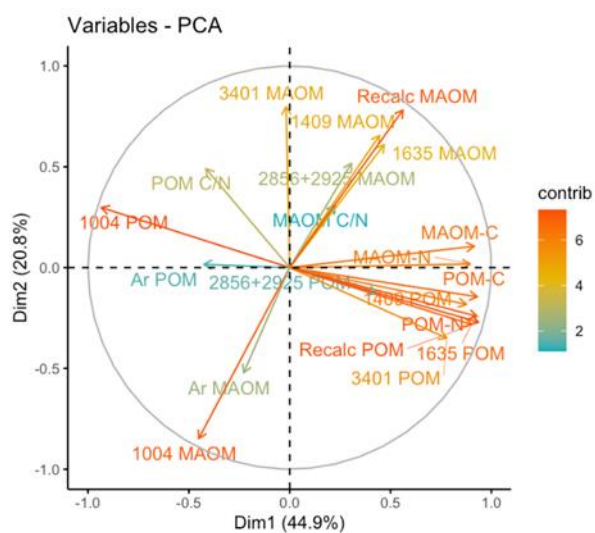

**Figure S3.** Principal component analyses of relative absorbances, C/N ratio, C and N concentrations, recalcitrance (Recalc) and aromaticity (Ar) of particulate soil organic matter (POM) and mineral-associated organic matter (MAOM) fractions.
