# Supplementary material
Source: MDPI journal article supplement (https://www.mdpi.com/2077-0472/11/9/903)

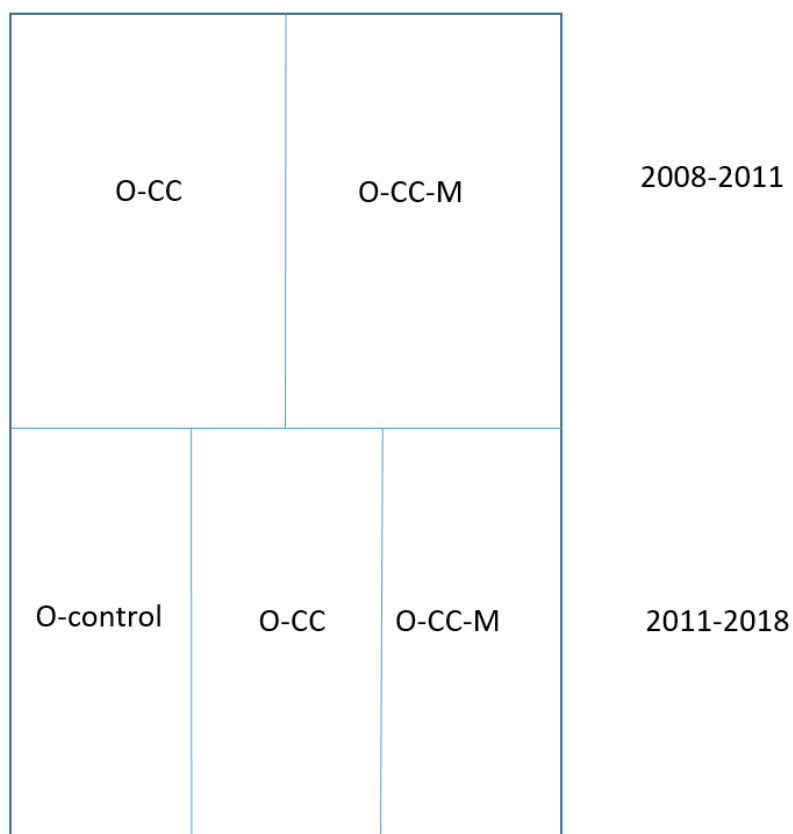

**Figure S1.** Change in the experimental design of the organic farming systems.

Supplement: s1 [file s1]
